# Supplementary material for: Engineering a lipid droplet targeting fluorescent probe with a large Stokes shift through ester substituent rotation for in vivo tumor imaging
Source: Royal Society of Chemistry journal article supplement (doi:10.1039/d0an01925a), 2020-10-21
Supplement: d0an01925a1.pdf [file d0an01925a1.pdf]

## Supporting Information

### Engineering Lipid Droplets Targeting Fluorescent Probe with Large Stokes Shift through Ester Substituent Rotation for In Vivo Tumor Imaging

Xing Wei,<sup>a,†</sup> Hongxing Zhang,<sup>b,†</sup> Yuanqiang Sun,<sup>a,\*</sup> Jing Liu,<sup>b,\*</sup> Zhaohui Li<sup>a,\*</sup>

<sup>a</sup>College of Chemistry, Green Catalysis Center, Henan Joint International Research Laboratory of Green Construction of Functional Molecules and Their Bioanalytical Applications, Zhengzhou Key Laboratory of Functional Nanomaterial and Medical Theranostic, Zhengzhou University, Zhengzhou 450001, China.

<sup>b</sup>School of Chemistry and Chemical Engineering, Shanxi University, Taiyuan 030006, China.

\*Corresponding authors. E-mail: yqsun@zzu.edu.cn, liujing4203@sxu.edu.cn, zhaohui.li@zzu.edu.cn

#### Contents

|                  |                                                                                                       |            |
|------------------|-------------------------------------------------------------------------------------------------------|------------|
| <b>Scheme S1</b> | Synthesis of the probe <b>1</b> .....                                                                 | <b>S-3</b> |
| <b>Scheme S2</b> | Synthesis of the probe <b>2</b> .....                                                                 | <b>S-3</b> |
| <b>Figure S1</b> | <sup>1</sup> H-NMR spectra of probe <b>1</b> .....                                                    | <b>S-4</b> |
| <b>Figure S2</b> | <sup>13</sup> C-NMR spectra of probe <b>1</b> .....                                                   | <b>S-5</b> |
| <b>Figure S3</b> | HRMS spectrum of probe <b>1</b> .....                                                                 | <b>S-5</b> |
| <b>Figure S4</b> | <sup>1</sup> H-NMR spectra of probe <b>2</b> .....                                                    | <b>S-6</b> |
| <b>Figure S5</b> | <sup>13</sup> C-NMR spectra of probe <b>2</b> .....                                                   | <b>S-6</b> |
| <b>Figure S6</b> | HRMS spectrum of probe <b>2</b> .....                                                                 | <b>S-6</b> |
| <b>Figure S7</b> | Absorption spectra of probe <b>1</b> and probe <b>2</b> .....                                         | <b>S-8</b> |
| <b>Figure S8</b> | Absorption and fluorescence intensity of probe <b>1</b> and probe <b>2</b> in different solvents..... | <b>S-8</b> |
| <b>Table S1</b>  | Photophysical properties of probe <b>1</b> .....                                                      | <b>S-9</b> |

|                   |                                                                               |             |
|-------------------|-------------------------------------------------------------------------------|-------------|
| <b>Table S2</b>   | Photophysical properties of probe <b>2</b> .....                              | <b>S-10</b> |
| <b>Figure S9</b>  | Fluorescence spectra of probe <b>1</b> in different DIOX content solutions... | <b>S-11</b> |
| <b>Figure S10</b> | Fluorescence spectra of probe <b>2</b> in different DIOX content solutions... | <b>S-11</b> |
| <b>Figure S11</b> | Fluorescence spectra of probe <b>1</b> in different viscosity.....            | <b>S-12</b> |
| <b>Figure S12</b> | UV-Vis and fluorescence spectra of probe <b>1</b> in different pH.....        | <b>S-12</b> |
| <b>Figure S13</b> | UV-Vis and fluorescence spectra of probe <b>2</b> in different pH.....        | <b>S-13</b> |
| <b>Figure S14</b> | Fluorescence emission spectra of biologically active molecules.....           | <b>S-13</b> |
| <b>Figure S15</b> | Cell viability of probe <b>1</b> and probe <b>2</b> .....                     | <b>S-14</b> |
| <b>Figure S16</b> | Co-localization experiments of probe <b>1</b> .....                           | <b>S-14</b> |
| <b>Figure S17</b> | Cell imaging of Nile Red with different irradiation time.....                 | <b>S-15</b> |
| <b>Figure S18</b> | Cell imaging of probe <b>1</b> with different irradiation time.....           | <b>S-15</b> |
| <b>Figure S19</b> | Fluorescence intensity of probe <b>1</b> and Nile Red over time.....          | <b>S-16</b> |

## Experimental Section

### Synthesis and characterization of Probe 1

A mixture of diethyl oxalacetate (1.818 g, 10 mM) and 3-(dimethylamino) phenol (1.3718 g, 10 mM) was stirred at 120 °C for 3 hours. After cooling, the reaction mixture was diluted with CH<sub>2</sub>Cl<sub>2</sub>, which was purified by column chromatography on silica gel (CH<sub>2</sub>Cl<sub>2</sub>) to afford probe **1** as orange solid (1.07 g, 45% yield). <sup>1</sup>H-NMR (CDCl<sub>3</sub>, 400MHz): δ 8.061 (d, 1H), δ 6.657 (dd, *J*<sub>1</sub> = 2.4Hz, *J*<sub>2</sub> = 11.6 Hz, 1H), δ 6.586 (s, 1H), δ 6.540 (d, *J* = 2.4 Hz, 1H), δ 4.445 (q, *J* = 7.2 Hz, 2H), δ 3.095 (s, 6H), δ 1.440 (t, *J* = 7.2 Hz, 3H); <sup>13</sup>C-NMR (CDCl<sub>3</sub>, 400MHz): δ 164.629, 161.584, 156.703, 152.954, 142.957, 127.480, 111.94, 109.40, 105.583, 98.179, 62.120, 40.072, 14.136. HRMS (m/z): [M + H]<sup>+</sup> calcd for, C<sub>14</sub>H<sub>15</sub>NO<sub>4</sub>, 262.1074; found, 262.1074.

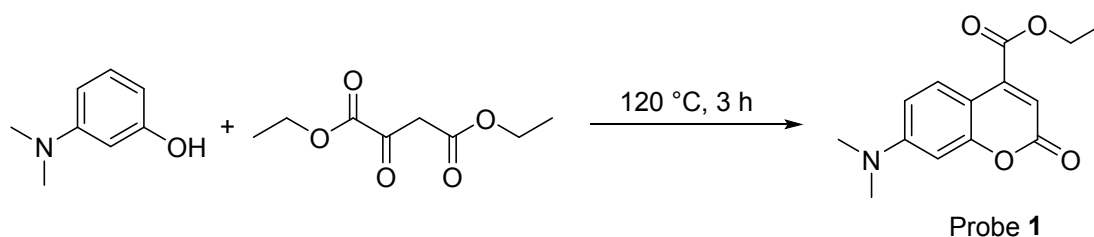

**Scheme S1.** The synthetic route of probe **1**.

### Synthesis and characterization of Probe 2

4-(dimethylamino)-2-hydroxybenzaldehyde (200mg, 1.21 mmol), ethyl malonate (273μL, 1.82 mmol), piperidine (10 μL) were stirred in ethanol (3 mL) under 90 °C for 11h. And then, the mixture was cooled and stayed overnight at -4 °C. After filtering the mixture, we can obtain a yellow solid probe **2** (95.2 mg, yield: 26.7%). <sup>1</sup>H-NMR (CDCl<sub>3</sub>, 400 MHz): δ 8.444 (s, 1H), δ 7.382 (d, *J* = 8.8 Hz, 1H), δ 6.634 (dd, *J*<sub>1</sub> = 2.4 Hz, *J*<sub>2</sub> = 8.8 Hz, 1H), δ 6.461 (d, *J* = 2.4 Hz, 1H), δ 4.379 (q, *J* = 7.2 Hz, 2H), δ 3.125 (s, 6H), δ 1.394 (t, *J* = 7.2 Hz, 3H); <sup>13</sup>C-NMR (CDCl<sub>3</sub>, 400 MHz): δ 164.18, 158.06, 154.77, 149.30, 130.72, 109.67, 107.99, 97.18, 61.22, 40.23, 14.36. HRMS (m/z): [M + H]<sup>+</sup> calcd for, C<sub>14</sub>H<sub>15</sub>NO<sub>4</sub>, 262.1074; found, 262.1074.

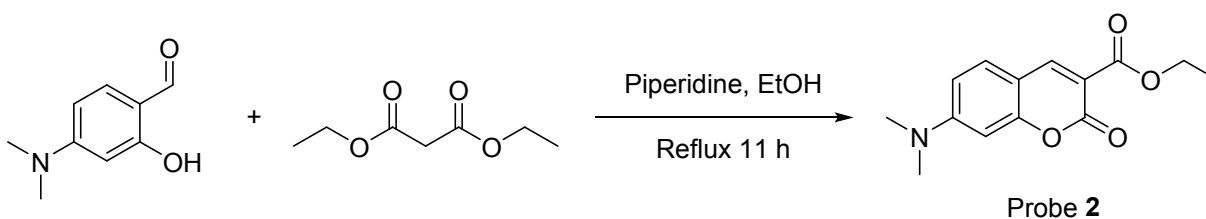

**Scheme S2.** The synthetic routine of probe **2**.

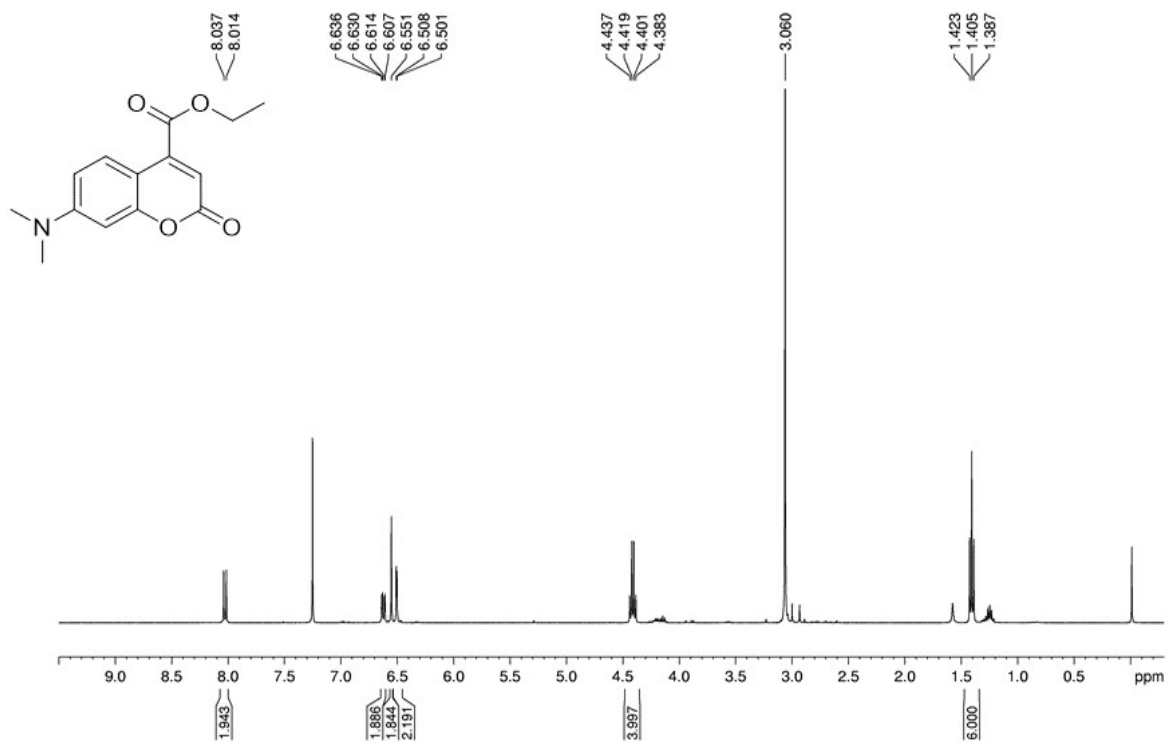

**Figure S1.** The <sup>1</sup>H NMR spectrum of probe 1 in CDCl<sub>3</sub>.

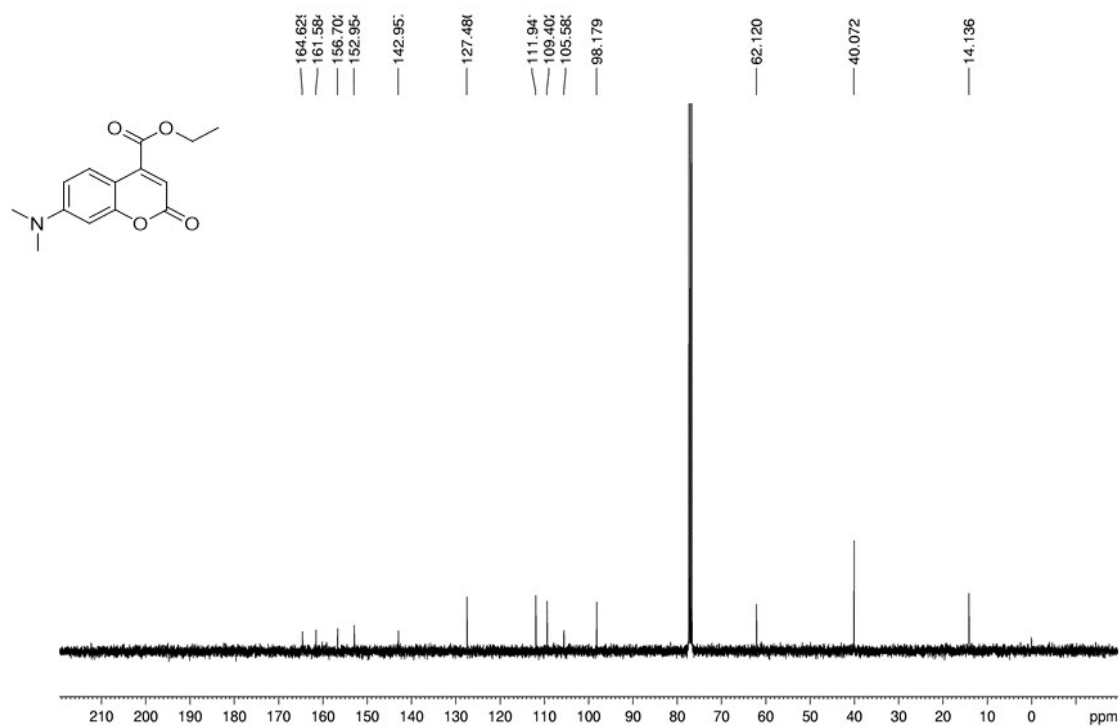

**Figure S2.** The <sup>13</sup>C NMR spectrum of probe **1** in CDCl<sub>3</sub>.

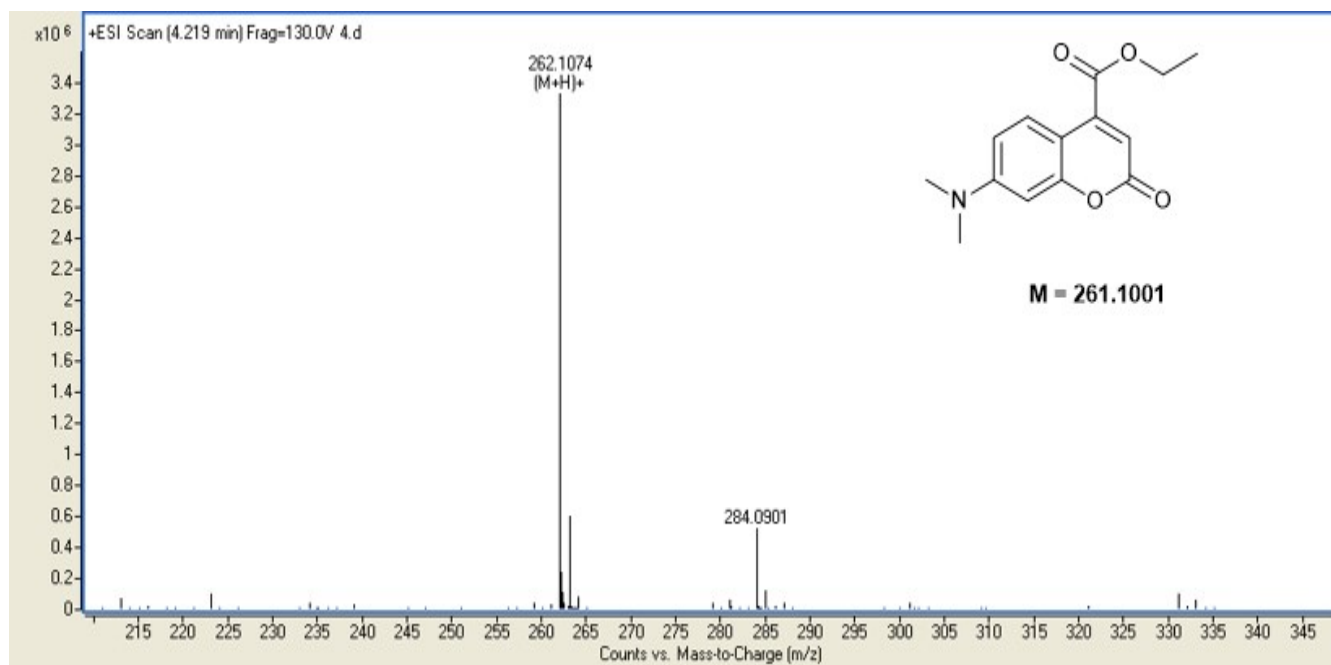

**Figure S3.** The HRMS spectrum of probe **1**.

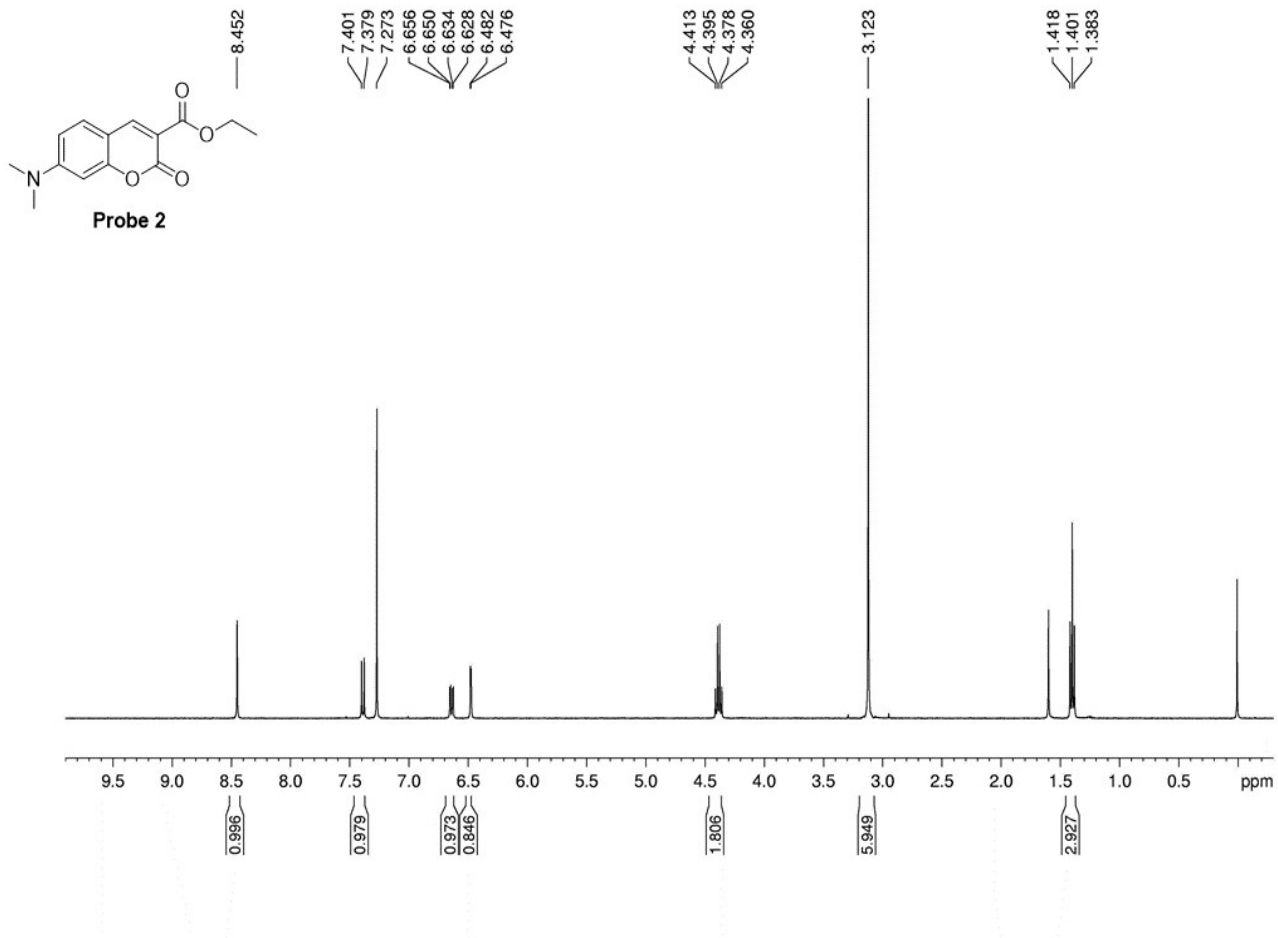

**Figure S4.** The  $^1\text{H}$  NMR spectrum of probe **2** in  $\text{CDCl}_3$ .

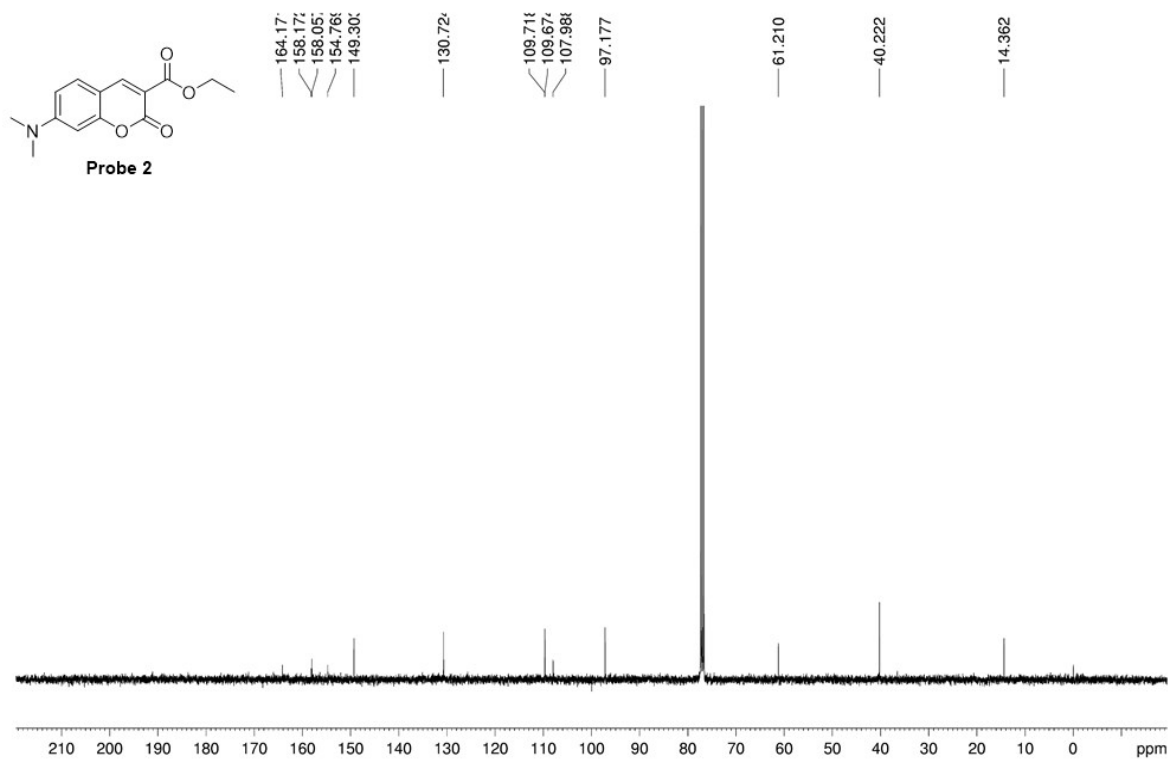

F

figure S5. The  $^{13}\text{C}$  NMR spectrum of probe 2 in  $\text{CDCl}_3$ .

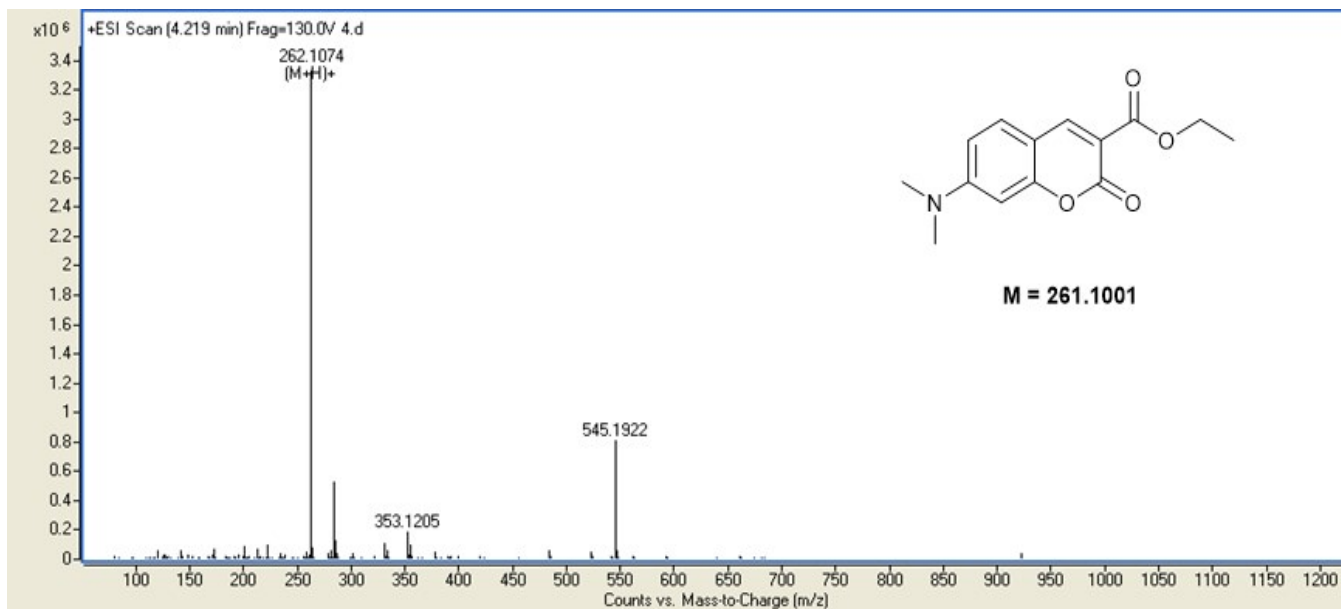

Figure S6. The HRMS spectrum of probe 2.

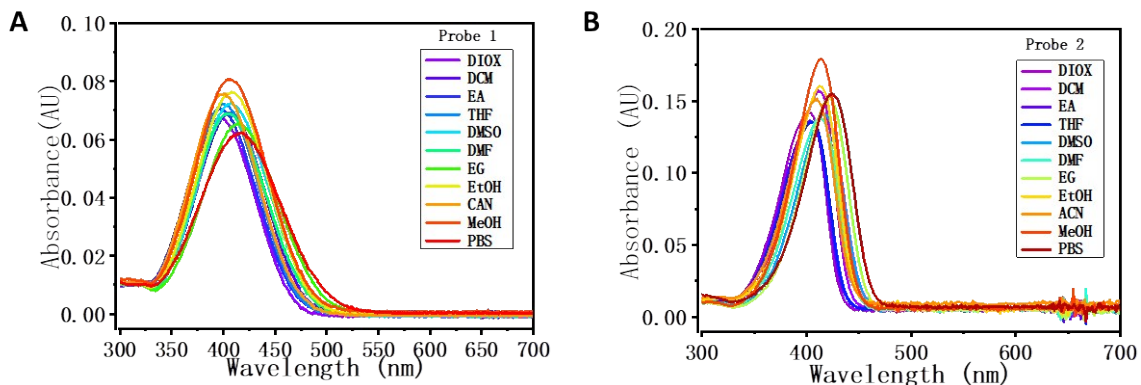

**Figure S7.** Absorption spectra of 4  $\mu\text{M}$  probe 1 (A) and probe 2 (B) in PBS.

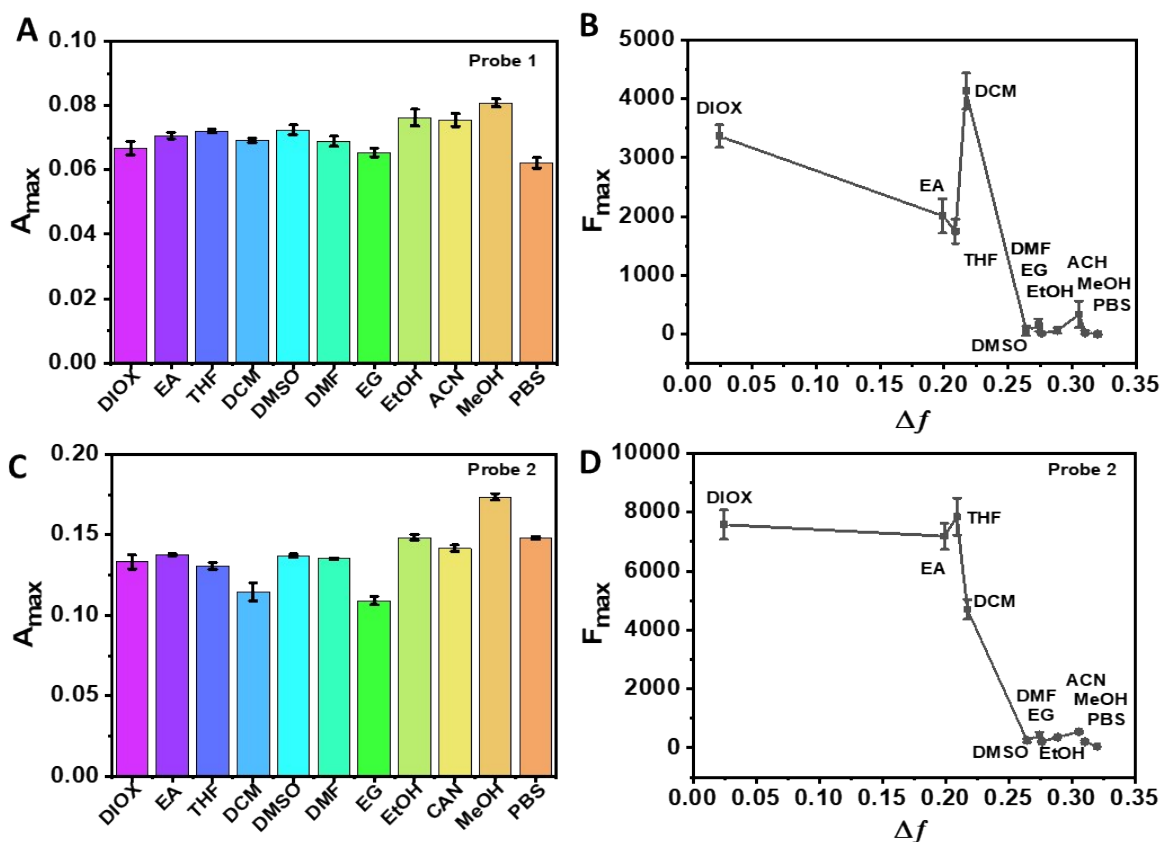

**Figure S8. A)** The UV-vis spectra and plot of intensity against dye concentration for probe 1 (4  $\mu\text{M}$ ) in PBS buffer (pH 7.4, 10 mM); **B)** UV-visible absorption of the probe 1 (4  $\mu\text{M}$ ) at 405 nm; **C)** The UV-vis spectra and plot of intensity against dye concentration for probe 2 (4  $\mu\text{M}$ ) in PBS buffer (pH 7.4, 10 mM); **D)** UV-visible absorption of the probe 2 (4  $\mu\text{M}$ ) at 415 nm; The measured data after the probe was placed for 2 min at 25  $^{\circ}\text{C}$ . (Probe 1: Ex = 420nm, 5,5 slit/nm, 400 Volta; Probe 2: Ex = 435 nm, 5,5 slit/nm, 400 Volta)



**Table S1.** Photophysical properties of probe **1** in various solvents. Excitation wavelength: 390 nm. Absolute quantum yield.

| <b>Solvent</b> | $\lambda_{\text{Abs}}$<br>(nm) | $\epsilon$<br>(M <sup>-1</sup> ·cm <sup>-1</sup> ) | $\lambda_{\text{Em}}$<br>(nm) | <b>Stokes shift</b><br>(nm) | <b>QY</b><br>$\Phi$ (%) |
|----------------|--------------------------------|----------------------------------------------------|-------------------------------|-----------------------------|-------------------------|
| <b>DIOX</b>    | 394                            | 16824.25                                           | 522                           | 128                         | 52.78                   |
| <b>EA</b>      | 397                            | 17674.5                                            | 533                           | 136                         | 33.72                   |
| <b>THF</b>     | 400                            | 18024.5                                            | 534                           | 134                         | 26.98                   |
| <b>DCM</b>     | 408                            | 17300.75                                           | 530                           | 122                         | 49.30                   |
| <b>DMSO</b>    | 407                            | 18120.5                                            | 570                           | 163                         | 4.10                    |
| <b>DMF</b>     | 404                            | 17233                                              | 559                           | 155                         | 8.58                    |
| <b>EG</b>      | 414                            | 16356                                              | 573                           | 159                         | 1.01                    |
| <b>EtOH</b>    | 408                            | 19067.25                                           | 560                           | 152                         | 3.41                    |
| <b>ACN</b>     | 401                            | 18982.25                                           | 553                           | 152                         | 12.21                   |
| <b>MeOH</b>    | 405                            | 20215.5                                            | 568                           | 163                         | 1.80                    |
| <b>PBS</b>     | 417                            | 15550.25                                           | 601                           | 184                         | 0.18                    |

**Table S2.** Photophysical properties of probe **2** in various solvents. Excitation wavelength: 390 nm.

| <b>Solvent</b> | $\lambda_{\text{Abs}}$<br>(nm) | $\epsilon$<br>( $\text{M}^{-1}\cdot\text{cm}^{-1}$ ) | $\lambda_{\text{Em}}$<br>(nm) | <b>Stokes shift</b><br>(nm) | <b>QY</b><br>$\Phi$ (%) |
|----------------|--------------------------------|------------------------------------------------------|-------------------------------|-----------------------------|-------------------------|
| <b>DIOX</b>    | 404                            | 33226.73                                             | 455                           | 51                          | 106.49                  |
| <b>EA</b>      | 404                            | 34328.82                                             | 462                           | 58                          | 82.64                   |
| <b>THF</b>     | 404                            | 32507.78                                             | 463                           | 59                          | 70.09                   |
| <b>DCM</b>     | 412                            | 26334.64                                             | 466                           | 53                          | 101.22                  |
| <b>DMSO</b>    | 417                            | 28884.77                                             | 484                           | 67                          | 6.16                    |
| <b>DMF</b>     | 412                            | 30856.73                                             | 478                           | 66                          | 9.98                    |
| <b>EG</b>      | 422                            | 19610.29                                             | 485                           | 63                          | 6.41                    |
| <b>EtOH</b>    | 413                            | 33432.48                                             | 475                           | 62                          | 8.63                    |
| <b>ACN</b>     | 409                            | 34050.7                                              | 473                           | 64                          | 7.94                    |
| <b>MeOH</b>    | 413                            | 38644.43                                             | 478                           | 65                          | 3.12                    |
| <b>PBS</b>     | 423                            | 25834.2                                              | 483                           | 60                          | 0.68                    |

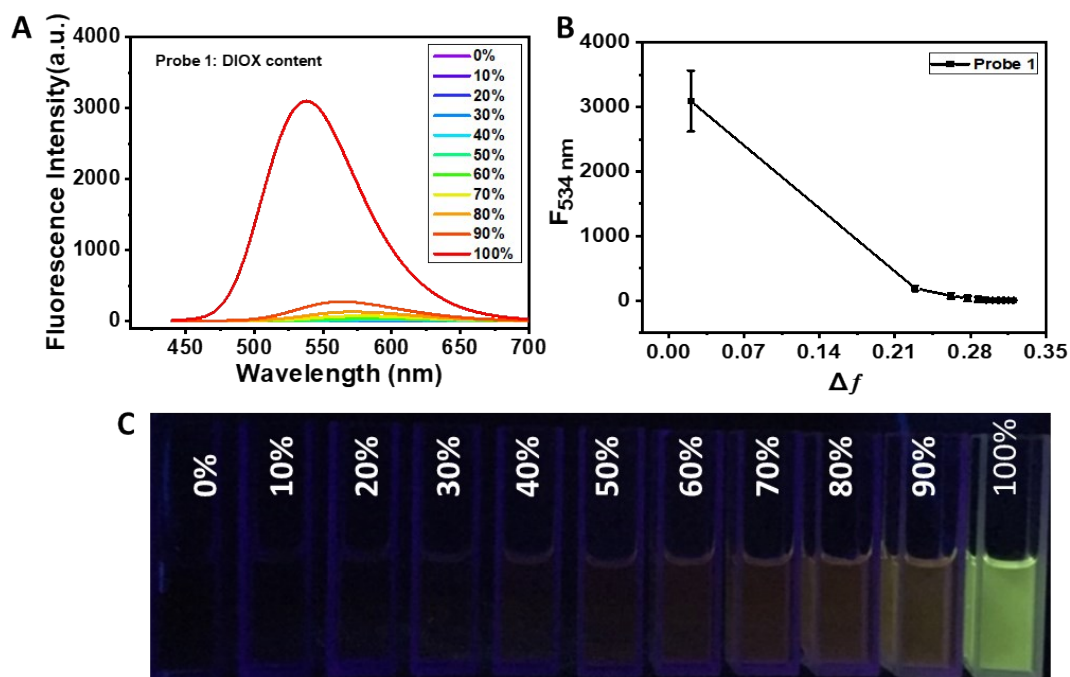

**Figure S9. A)** Fluorescence emission spectra of probe 1 (4  $\mu\text{M}$ ) in 1,4-dioxane-water solution with different 1,4-dioxane content; **B)** Fluorescence emission spectra of probe 1 (4  $\mu\text{M}$ ) at 536 nm in different 1,4-dioxane content solutions; **C)** Photograph of probe 1 (4  $\mu\text{M}$ ) under different levels of 1,4-dioxane (1,4-dioxane / PBS) under 365 nm violet light. (Ex = 420nm, 5,5 slit/nm, 400 Volta)

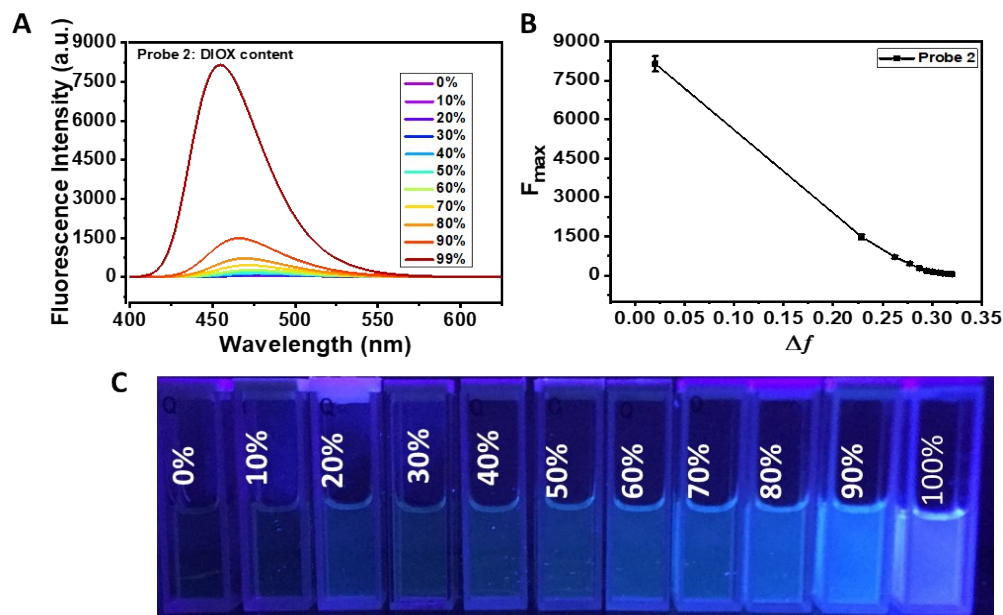

**Figure S10. A)** Fluorescence emission spectra of probe 2 (4  $\mu\text{M}$ ) in different DIOX content solutions; **B)** Fluorescence emission spectra of probe 2 (4  $\mu\text{M}$ ) at 488 nm in different DIOX content solutions; **C)** Photograph of probe 2 (4  $\mu\text{M}$ ) under different levels of DIOX (DIOX / PBS) under 365 nm violet light. (Ex = 435 nm, 5,5 slit/nm, 400 Volta)

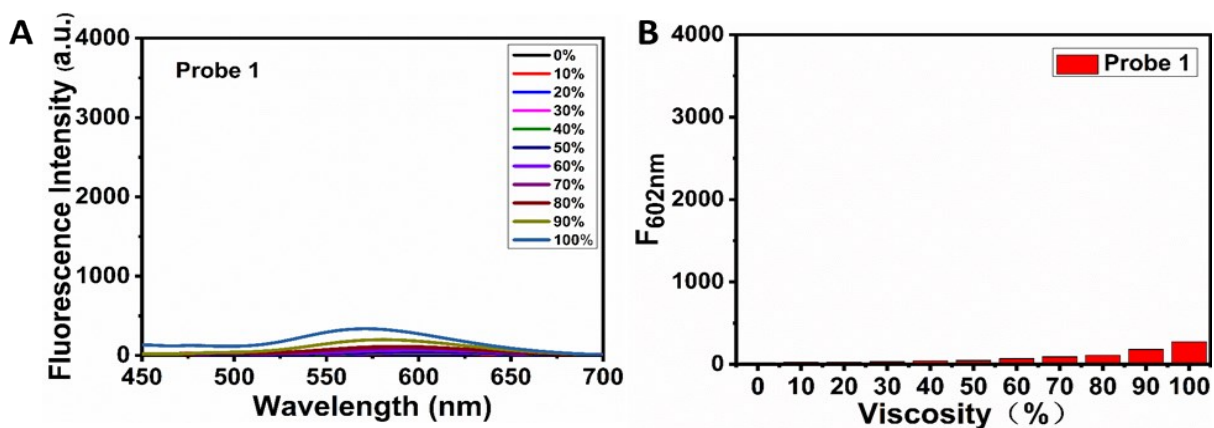

**Figure S11. A)** Fluorescence emission spectrum of probe 1 (4 μM) at different levels of glycerol at 25 °C; **B)** Fluorescence emission spectrum of probe 1 (4 μM) at different levels of glycerol at 602 nm. glycerin/PBS (Ex = 420 nm, 5,5 slit/nm, 600 Volta)

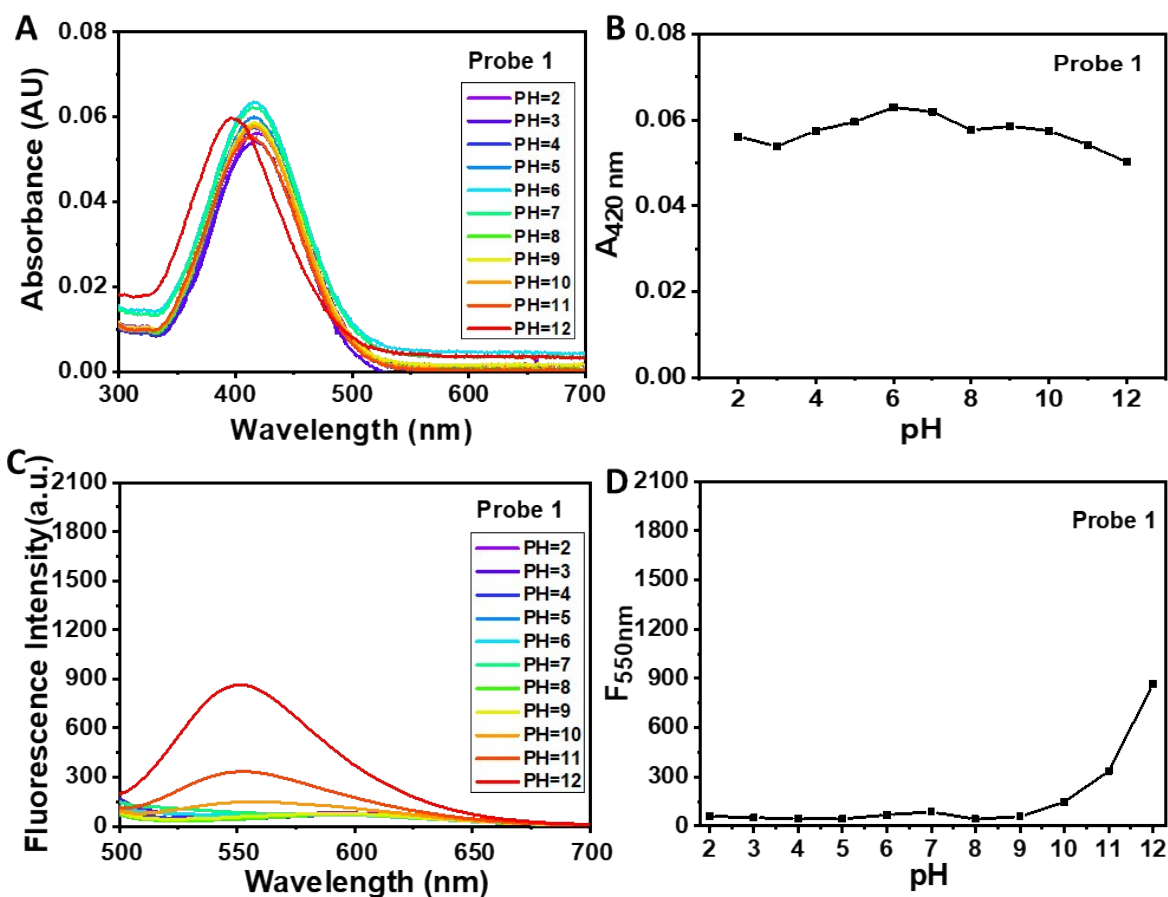

**Figure S12. UV-Vis spectra (A and B) and fluorescence emission spectra (C and D) of probe 1 (4 μM) in different pH solutions (pH 7.4, 10 mM); (Ex = 435 nm, 5,5 slit/nm, 400 Volta)**

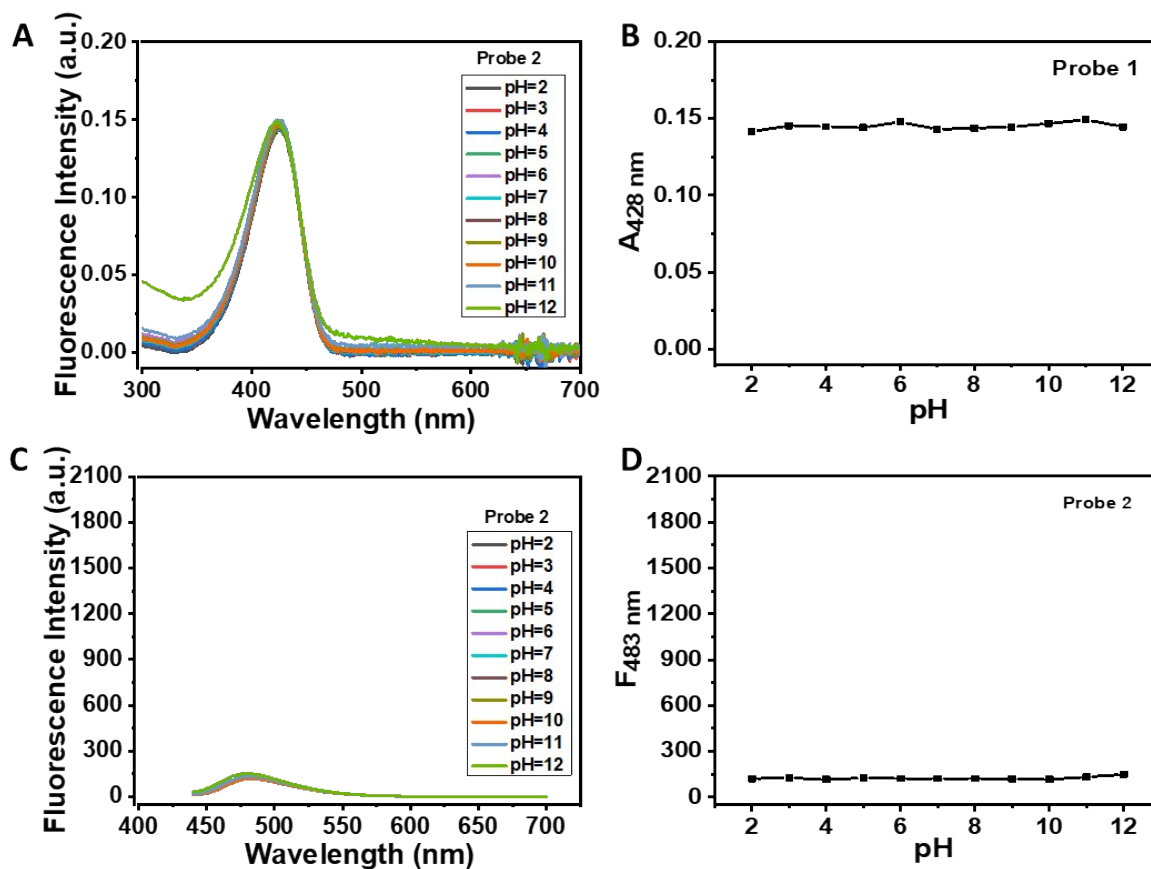

**Figure S13** UV-Vis spectra (A and B) and fluorescence emission spectra (C and D) of probe 2 (4  $\mu\text{M}$ ) in different pH solutions (pH 7.4, 10 mM); (Ex = 435 nm, 5,5 slit/nm, 400 Volta)

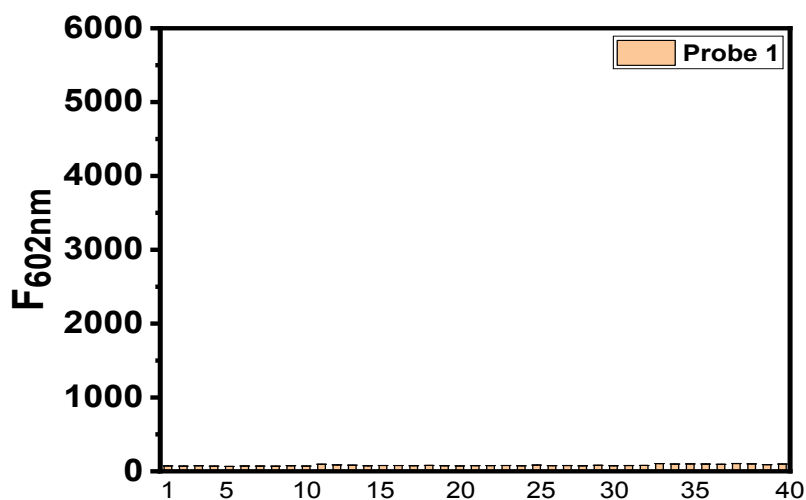

**Figure S14.** Histogram of fluorescence emission spectra of probe 1 (4  $\mu\text{M}$ ) at different Amino acid (PBS, Phe, Thr, Arg, Met, Pro, Lys, Leu, Iso, Ala, His, Asp, Val, Ser,  $\text{K}^+$ ,  $\text{Ca}^{2+}$ ,  $\text{Na}^+$ ,  $\text{Mg}^{2+}$ ,  $\text{Al}^{3+}$ ,  $\text{Zn}^{2+}$ ,  $\text{Fe}^{3+}$ ,  $\text{Cu}^{2+}$ ,  $\text{Ni}^{2+}$ ,  $\text{Cr}^{3+}$ ,  $\text{Mn}^{2+}$ , PBS, NaF, NaBr, KI,  $\text{Na}_2\text{PO}_4$ ,  $\text{Na}_2\text{CO}_3$ , CYS, HCY, GSH, PBS,  $\text{NaNO}_2$ , NaClO,  $\text{H}_2\text{O}_2$ ,  $\text{BrO}^-$ ,  $\text{OH}^-$  (100  $\mu\text{M}$ ) for 5 min at 25  $^\circ\text{C}$ .

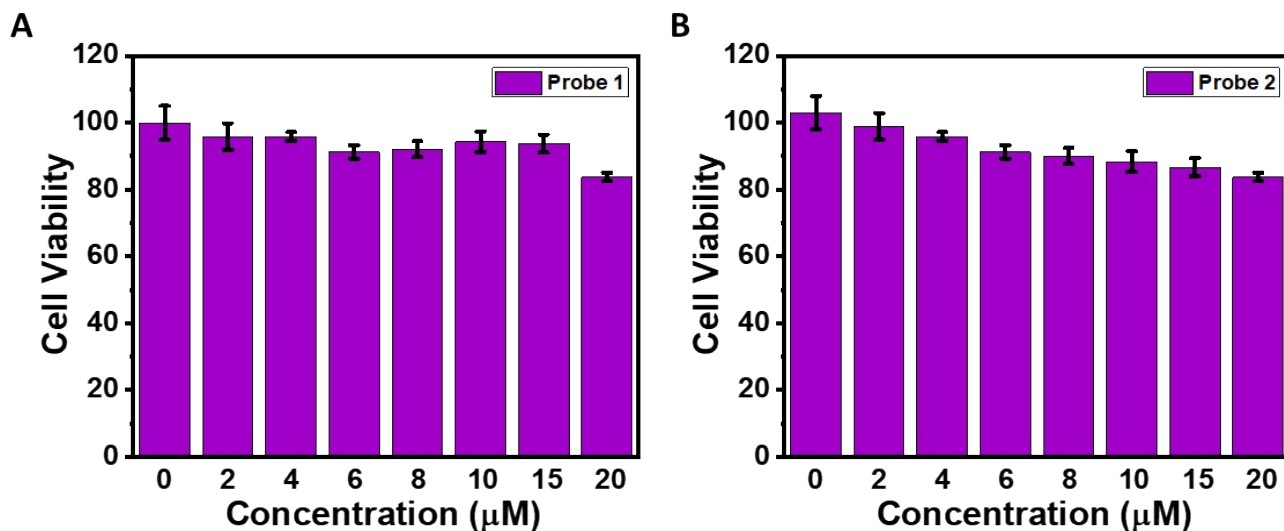

**Figure S15.** Cell viability of HepG-2 cells with different concentrations of probe 1 and probe 2 respectively. The experiments were carried out for 5 times.

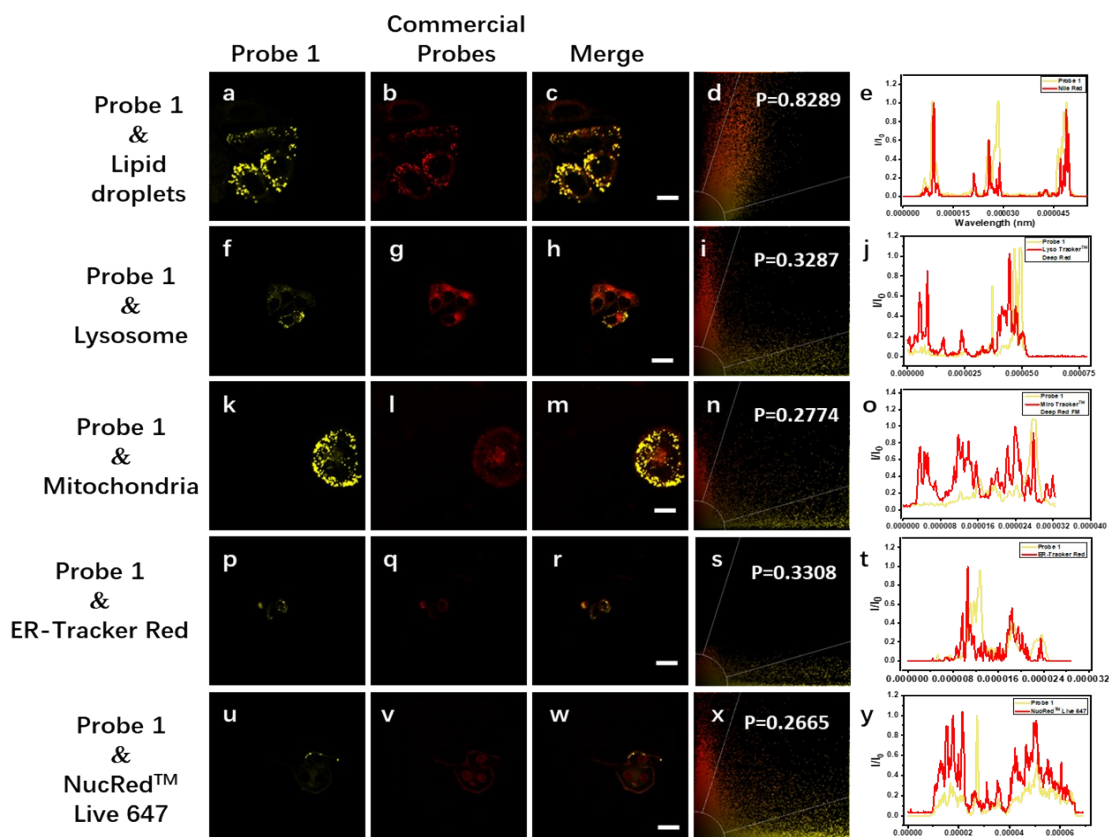

**Figure S16.** Confocal microscopic images of HepG-2 cells stained with probe 1 and commercial probes. Cells were stained with 4 μM probe 1 for 1 min, or Nile Red (500 nM), or 50 nM LysoTracker™ Deep

Red for 15 min, or 50 nM MitoTracker™ Deep Red FM for 15 min, or 500 nM ER-Tracker™ Red for 15 min, NucRed™ Live 647. Scale bar: 25  $\mu$ m.

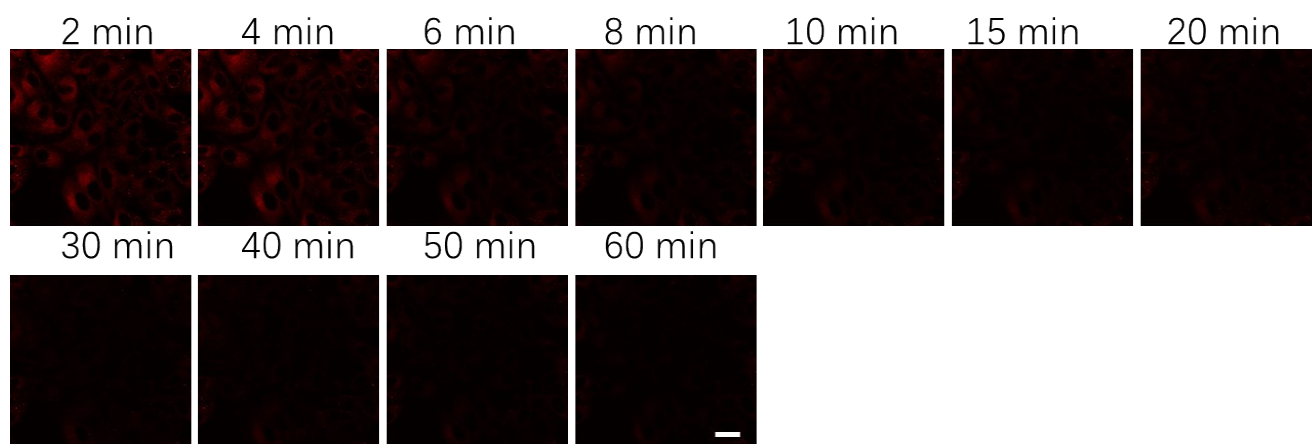

**Figure S17.** Nile Red incubated HepG-2 cells, fluorescence imaging under confocal microscope illumination for 60 minutes. Scale bar: 20  $\mu$ m.

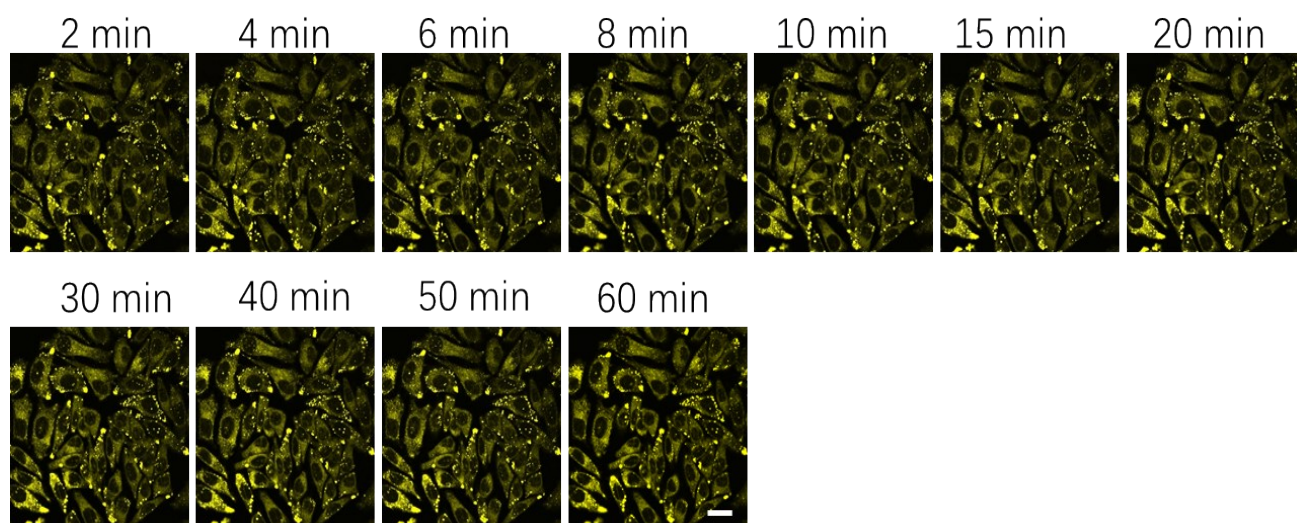

**Figure S18.** Probe 1 incubated HepG-2 cells, fluorescence imaging under confocal microscope illumination for 60 minutes. Scale bar: 20  $\mu$ m.

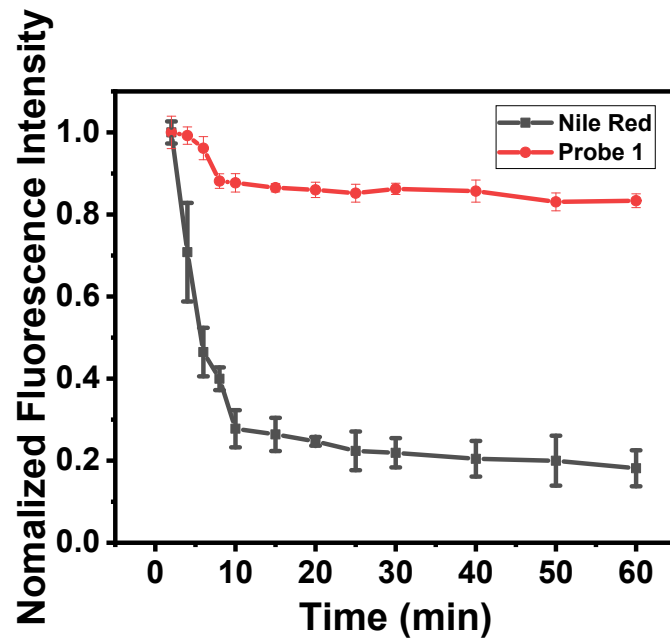

**Figure S19.** HepG-2 cells were incubated with Nile Red and probe 1, respectively, and the trend graph of fluorescence changes under confocal microscope illumination for 60 minutes. Mean fluorescence intensities of 50 cells of each sample.
